# Supplementary material for: Label-free, resettable, and multi-readout logic gates based on chemically induced fluorescence switching of gold nanoclusters
Source: Royal Society of Chemistry journal article supplement (doi:10.1039/c6tc02275h), 2016-01-01
Supplement: c6tc02275h1.pdf [file c6tc02275h1.pdf]

### Supporting Information

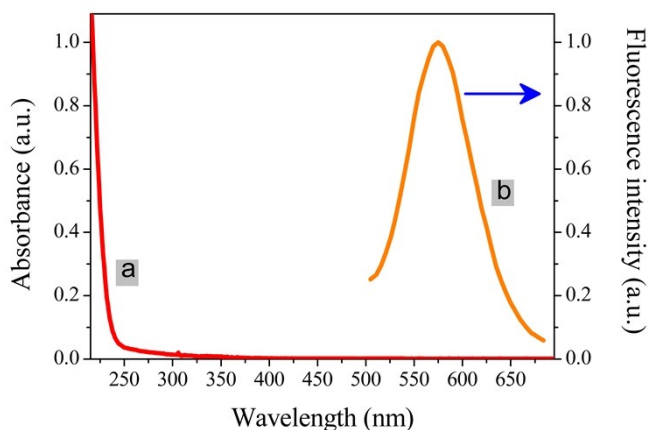

**Fig. S1** The absorption spectrum of Fe<sup>3+</sup> (10 μM) (a) and the emission spectrum of aqueous BSA/MPA-AuNCs solution (b).

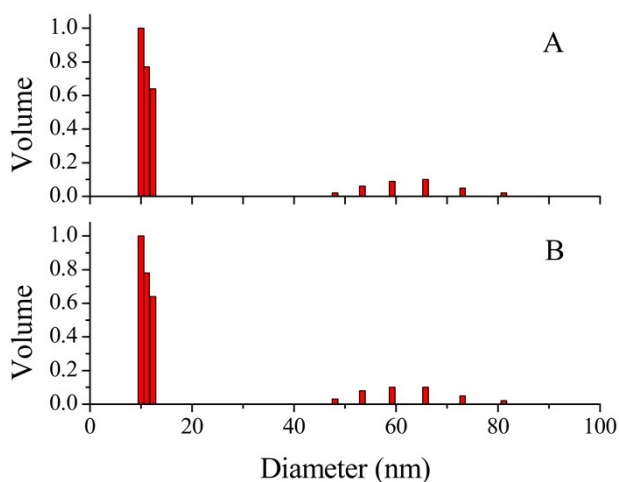

**Fig. S2** Hydrodynamic diameter distributions of BSA/MPA-AuNCs in the absence (A) and presence (B) of 10 μM Fe<sup>3+</sup>.

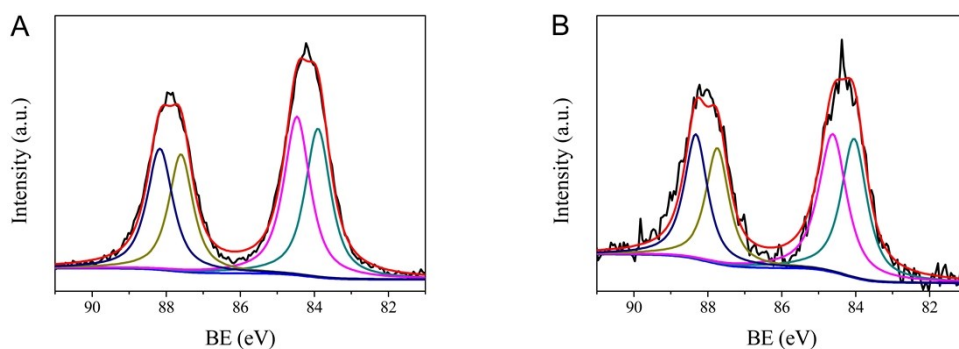

**Fig. S3** XPS spectra of Au(4f) of BSA/MPA-AuNCs in the absence (A) and presence (B) of 10  $\mu\text{M}$   $\text{Fe}^{3+}$ .

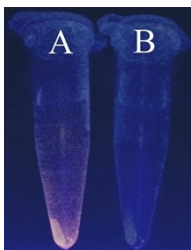

**Fig. S4** Photographs of MPA-AuNCs in the absence (A) and presence (B) of 10  $\mu\text{M}$   $\text{Fe}^{3+}$  under UV light.

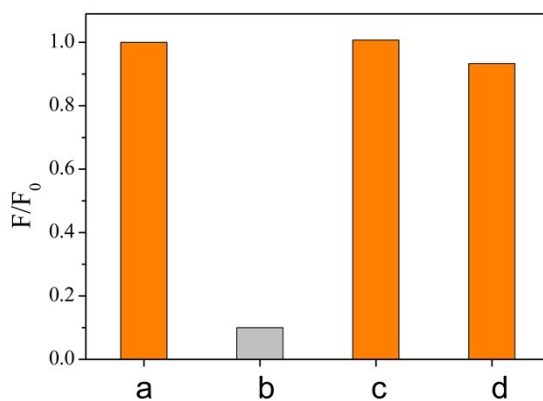

**Fig. S5** Fluorescence regeneration results for quenching by  $\text{Fe}^{3+}$  upon the addition of PPI. (a) BSA/MPA-AuNCs, (b) BSA/MPA-AuNCs in presence of 10  $\mu\text{M}$   $\text{Fe}^{3+}$ , (c) and BSA/MPA-AuNCs in presence of 100  $\mu\text{M}$  PPI, and (d) BSA/MPA-AuNCs containing 10  $\mu\text{M}$   $\text{Fe}^{3+}$  after the addition of 100  $\mu\text{M}$  PPI.  $F_0$  and  $F$  represent the PL intensity of BSA/MPA-AuNCs solution without and with chemicals, respectively.

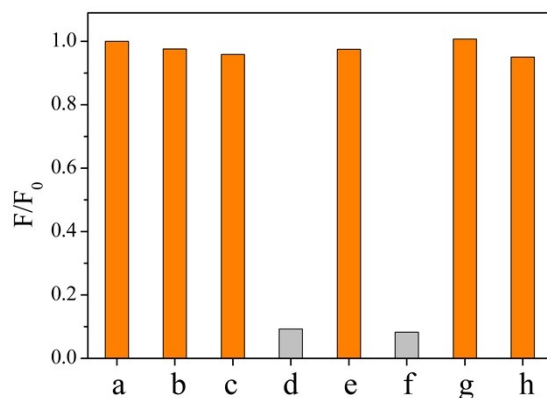

**Fig. S6** Fluorescence quenching effect  $F/F_0$  of the BSA/MPA-AuNCs (pH=3.0) incubated with (a) BSA/MPA-AuNCs, (b) BSA/MPA-AuNCs + 50  $\mu\text{M}$   $\text{Fe}^{2+}$ , (c) BSA/MPA-AuNCs + 20  $\mu\text{M}$   $\text{H}_2\text{O}_2$ , (d) BSA/MPA-AuNCs + 50  $\mu\text{M}$   $\text{Fe}^{2+}$  + 20  $\mu\text{M}$   $\text{H}_2\text{O}_2$ , (e) BSA/MPA-AuNCs + 500  $\mu\text{M}$  thiourea, (f) BSA/MPA-AuNCs + 50  $\mu\text{M}$   $\text{Fe}^{2+}$  + 20  $\mu\text{M}$   $\text{H}_2\text{O}_2$  + 500  $\mu\text{M}$  thiourea, (g) BSA/MPA-AuNCs + 100  $\mu\text{M}$  PPI, and (h) BSA/MPA-AuNCs + 50  $\mu\text{M}$   $\text{Fe}^{2+}$  + 20  $\mu\text{M}$   $\text{H}_2\text{O}_2$  + 100  $\mu\text{M}$  PPI.  $F_0$  and  $F$  represent the PL intensity of BSA/MPA-AuNCs solution without and with chemicals, respectively.

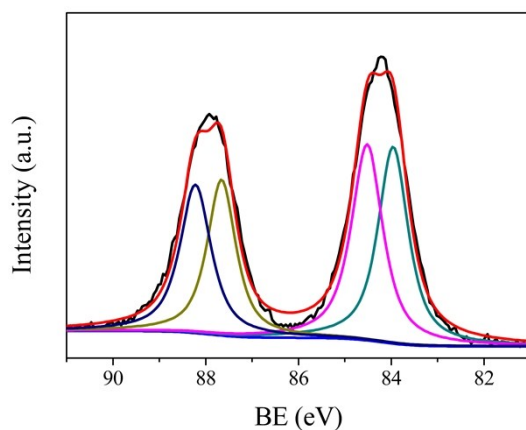

**Fig. S7** XPS spectra of Au(4f) of BSA/MPA-AuNCs in the presence of 50  $\mu\text{M}$   $\text{Fe}^{2+}$  and 20  $\mu\text{M}$   $\text{H}_2\text{O}_2$  (pH = 3.0).

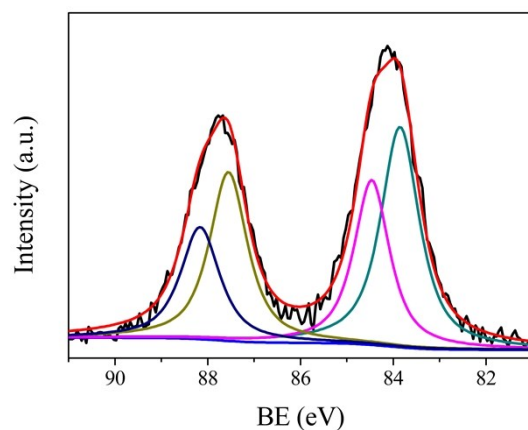

**Fig. S8** XPS spectra of Au(4f) of BSA/MPA-AuNCs in the presence of 50  $\mu\text{M}$   $\text{Fe}^{2+}$  (pH = 4.6).

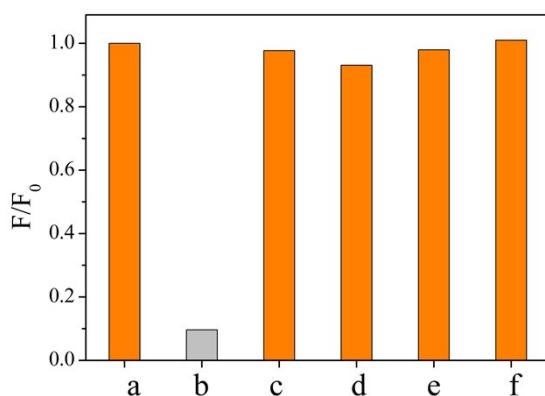

**Fig. S9** Fluorescence quenching effect  $F/F_0$  of the BSA/MPA-AuNCs (pH=4.6) incubated with (a) BSA/MPA-AuNCs, (b) BSA/MPA-AuNCs + 50  $\mu\text{M}$   $\text{Fe}^{2+}$ , (c) BSA/MPA-AuNCs + 100  $\mu\text{M}$  PPI, (d) BSA/MPA-AuNCs + 50  $\mu\text{M}$   $\text{Fe}^{2+}$  + 100  $\mu\text{M}$  PPI, (e) BSA/MPA-AuNCs + 200  $\mu\text{M}$  ascorbic acid, (f) BSA/MPA-AuNCs + 50  $\mu\text{M}$   $\text{Fe}^{2+}$  + 200  $\mu\text{M}$  ascorbic acid.  $F_0$  and  $F$  represent the PL intensity of BSA/MPA-AuNCs solution without and with chemicals, respectively.

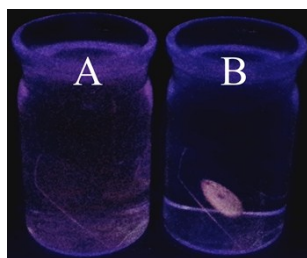

**Fig. S10** The photographs of the glass slides modified with the BSA/MPA-AuNCs after immersing in water for 10 min (A) and modified with the BSA/MPA-AuNCs-polyelectrolyte complexes after immersing in water for 48 h (B) under UV light.
